# Supplementary material for: Dogs’ recognition of human selfish and generous attitudes requires little but critical experience with people
Source: PLoS One. 2017 Oct 18;12(10):e0185696. doi: 10.1371/journal.pone.0185696 (PMC5646781; doi:10.1371/journal.pone.0185696)
Supplement: S1 Data — (XLSX) [file pone.0185696.s001.xlsx]

## Sheet: Latencies
Group	Experimenter	Subject	Trial 1	Trial 2	Trial 3	Trial 4	Trial 5	Trial 6	Trial 7	Trial 8	Trial 9	Trial 10	Trial 11	Trial 12
FD	G	01. FLAUTA	1.6	2.13	1.66	2	2.06	1.9	2.03	2.2	2.56	2.16	2.1	1.73
FD	G	02. ROMA	2.93	1.6	1.4	1.46	1.46	1.46	1.4	1.5	1.6	1.3	1.5	1.2
FD	G	03. VIRUTA	1.49	1.49	1.49	1.49	1.49	1.49	1.5	1.03	1.56	2.03	1.63	1.23
FD	G	04. TINTA	3.13	2.7	2.03	1.73	1.96	1.6	1.83	1.6	1.56	1.56	1.36	2.03
FD	G	05. PETUÑA	2.36	1.46	2.46	2.87	2.2	2.06	2.16	1.66	1.6	2.36	1.46	1.56
FD	G	06. PONGO	1.8	1.8	1.4	5.1	0.96	5.03	2.8	1.66	2.33	1.86	1.13	1.86
FD	G	07. PERLA	1.7	1.53	1.23	1.6	1.26	1.36	2.2	1.93	1.66	1.26	1.46	1.46
FD	G	08. HANNA	1.34	1.9	1.46	1.2	1.5	2.03	2.6	2.23	2.16	2.33	1.36	2.83
FD	G	09. NEGRA	11.14	4.87	3.9	4.1	2.26	2.16	4	3	6	4.27	2.5	2.66
FD	G	10. CLARITA	5.07	5.93	2.4	3.3	3.63	3.2	2.23	3.4	5.67	2.93	2.8	2.76
FD	G	11. AMI	2.36	2.3	2.63	2.03	1.1	1.86	2.33	1.6	1.46	1.36	1.2	1.2
FD	G	12. ROMAN	1.9	1.13	1.2	1.56	1	1.46	2.16	1.7	1.26	1.5	1.5	1.36
FD	G	13.NIGRI	15	15	2.33	10.47	6	6.8	2.66	1.96	2.83	3.33	3.4	2.66
FD	S	01. FLAUTA	1.83	1.5	1.73	1.73	2.43	3.43	2.63	1.46	1.76	1.66	2.16	3.97
FD	S	02. ROMA	2.26	1.6	1.33	1.3	1.46	1.4	1.06	1.2	1.26	1.33	1.8	1.4
FD	S	03. VIRUTA	2.39	2.39	2.39	2.39	2.39	2.39	1.46	2.2	2.83	3.17	2.46	2.23
FD	S	04. TINTA	1.63	2	2.9	2.6	1.8	3.27	2.43	2.66	2.83	4.9	3.6	3.23
FD	S	05. PETUÑA	2.33	1.56	2.87	2	2.26	1.83	1.46	1.83	2.06	3.23	2.16	2.13
FD	S	06. PONGO	2.06	2.06	2.33	3.57	2.33	2.33	2	2.06	2.43	2.53	2.3	2.13
FD	S	07. PERLA	1.76	1.96	1.56	1.63	2.33	1.43	1.46	1.63	1.76	1.86	1.9	1.93
FD	S	08. HANNA	2.23	2.53	2.2	3.57	2.43	3.3	4.07	4.23	5.9	2.93	5.13	8.04
FD	S	09. NEGRA	2.66	2.63	4	6.5	15	5.27	3.03	4.3	7.87	6.47	5.9	15
FD	S	10. CLARITA	3.33	3.43	2.23	2.66	2.2	2.23	2.63	2.56	2.9	2.2	4.07	3.17
FD	S	11. AMI	2.13	3.9	6.97	2.66	4.8	4.8	2.5	1.86	3.07	2.4	2.26	4.2
FD	S	12. ROMAN	3.4	2.5	2.6	2.93	2.4	4.27	1.4	2.1	5.67	2.53	1.86	3
FD	S	13.NIGRI	10.11	5.3	3.37	4.03	3.03	3.73	2.7	15	3.3	4.8	6.27	6.1
SHD	G	01. ALMENDRA	2.06	1.26	2.29	2.04	1.26	1.18	2.2	2.04	2	2.06	2.06	5.18
SHD	G	02. ALVINA	5	2.8	5.6	1.5	2.1	3.1	3.13	1.5	2.5	1.3	3.7	2
SHD	G	03. ANIK	2.26	2.26	2.4	2.26	2.53	4.27	4.4	2.8	3.33	6	3.6	2.13
SHD	G	04. ARIEL	1.6	4	1.7	1.4	6.7	1	5.2	3.6	1.83	1.96	2.16	4.8
SHD	G	05. BRIXA	15	15	6	2.4	6.67	2.06	2.1	10.81	2.3	1.8	4.13	2.26
SHD	G	06. CARPINCHO	7.14	3.5	2.9	4	4.7	3.2	8.8	7.6	3.8	7.3	8	5
SHD	G	07. CIEL	1.89	2.13	2.4	1.2	2.53	1.73	1.46	1.8	8.27	2.4	2.6	1.9
SHD	G	08. HUESO	4.03	3.2	3.07	2.9	6.47	1.8	4.97	9.87	4.1	3.6	4	2.6
SHD	G	09. JANIS	2.2	2.6	1.16	2.26	1.33	2	3.73	4.2	7.6	2.06	2.46	1.73
SHD	G	10. KING	1.33	1.6	1.4	1.06	2.3	1.4	2.06	1.43	1.6	1.6	3.27	3.5
SHD	G	11. OSO	1.66	2.3	5.93	4	8.27	6.4	4	6.9	6	5.5	2.1	0.93
SHD	G	12. RAFAELA	2.53	3.07	2.53	3	2.6	3.73	3.6	4.4	2.4	3.13	3.93	3.07
SHD	G	13. APOLO	8.8	2.66	3.13	15	5.8	7.6	2.8	4.3	1.73	2.23	2	2.87
SHD	G	14. NEGRO	2	7.07	1.24	1.4	1.93	1.73	2.93	2.5	2.13	1.53	1.4	2.4
SHD	G	15. MARCELA	2.6	3.7	3.3	2.43	3.47	2.66	1.73	2	2.26	2.66	7	1.83
SHD	G	16. MAFALDA	2	1.33	1.06	2.97	1.1	1.46	2.03	1.93	1.63	2	1.7	1.5
SHD	G	17. KALENA	2.1	2.2	1.6	2.13	1.66	2	1.36	2.76	2.33	1.4	1.23	1.53
SHD	G	18. LINDA	3.737	1.869	1.869	1.602	1.068	1.068	1.869	1.869	1.869	1.602	1.602	1.068
SHD	G	19. MARRON	4.805	4.605	3.403	11.812	9.409	5.005	4.605	3.604	3.604	2.002	2.402	2.202
SHD	S	01. ALMENDRA	1.18	2.06	4.24	2.12	1.24	4.24	9.06	15	4	5.18	3.24	15
SHD	S	02. ALVINA	15	1.7	1.6	5.47	1.73	3.47	1.7	4.8	1.9	2.9	2.4	1.9
SHD	S	03. ANIK	2.66	15	15	2	15	3.2	3	2.4	1.9	5.2	2.2	1.9
SHD	S	04. ARIEL	15	1.4	15	4.53	15	9.2	1.06	1.76	4	1.6	2.9	15
SHD	S	05. BRIXA	3.07	2.13	3.6	1.33	15	1.8	2.2	2.7	15	3.2	9.67	15
SHD	S	06. CARPINCHO	11.21	7.4	7.04	5.8	8.2	15	9.2	15	15	15	9.91	15
SHD	S	07. CIEL	1.73	2	4.1	1.9	1.73	1.86	4.8	2	3.33	3.1	3	2.13
SHD	S	08. HUESO	3.6	3.6	2.2	2.4	1.46	3.4	3	2.26	2.26	4.2	5.47	15
SHD	S	09. JANIS	3.33	8.5	3.87	5	2.8	4.13	5.5	2.8	2.8	2.6	3.3	15
SHD	S	10. KING	1.73	2.23	3.8	1.73	1.7	2.23	1.6	2.6	1.66	3.17	1.7	1.66
SHD	S	11. OSO	1.73	2.4	8.92	9.61	7.8	15	2.06	7.1	15	4.93	6.37	4.6
SHD	S	12. RAFAELA	5.33	2.8	3.47	9.71	5.9	15	3.47	2.53	3	3.87	4.5	3.83
SHD	S	13. APOLO	15	3.33	14.34	15	6.87	2.66	3.1	12	15	15	15	5.4
SHD	S	14. NEGRO	1.5	1.8	2.1	0.9	1.5	1.53	2	1.2	1.56	1.63	1.63	1.1
SHD	S	15. MARCELA	3.37	2.87	2.8	1.96	2.93	2.66	1.96	2.56	3.23	2.9	7.64	4.67
SHD	S	16. MAFALDA	1.66	1.13	1.83	1.2	1.73	1.93	1.8	1.4	1.73	1.76	2.56	5.07
SHD	S	17. KALENA	2.6	0.83	1.63	1.73	1.1	15	0.8	1	0.86	1.83	1.36	2.53
SHD	S	18, LINDA	3.737	2.402	2.402	2.669	2.402	3.203	1.869	1.869	2.936	2.135	4.538	15
SHD	S	19. MARRON	2.603	2.603	2.402	2.803	2.402	2.202	2.002	2.002	2.002	1.802	3.837	2.269
PUP	G	01. ERIK	2.803	3.07	3.537	2.536	1.068	1.802	1.001	1.468	1.134	1.401	1.768	1.969
PUP	G	02. MARRON	2.603	4.605	1.802	2.002	2.002	2.002	2.002	1.802	2.002	2.002	2.803	4.805
PUP	G	03. MANCHITA	3.971	1.702	1.869	3.403	2.135	1.335	15	1.869	2.936	2.936	1.602	2.135
PUP	G	04. NARANJA	2.402	1.869	8.809	12.813	6.406	2.402	1.335	1.602	1.335	1.335	1.602	1.335
PUP	G	05. AMANITA	2.002	1.001	2.002	1.602	1.001	1.401	15	3.804	15	15	15	15
PUP	G	06. VIOLETA	2.06	2.06	2.06	2.06	2.06	2.06	1.201	1.602	3.737	1.068	3.203	1.602
PUP	G	07. LEX	1.869	2.135	1.068	1.602	1.602	2.135	1.869	1.335	1.602	5.873	2.669	1.335
PUP	G	08. KIRA	10.41	13.013	4.605	15	10.21	0.801	2.002	4.204	4.004	6.206	2.803	9.009
PUP	G	09. MOROCHO	1.869	2.669	6.139	3.737	2.936	2.669	1.869	1.869	6.139	6.673	1.602	3.203
PUP	G	10. WILLY	2.669	2.402	1.335	1.602	1.602	2.402	3.737	2.402	1.602	1.869	1.068	1.869
PUP	G	11. PUMBA	4.2	2.5	1.16	0.7	3.4	2.6	3.15	1.38	1.65	2.5	2.6	1.55
PUP	G	12. SIMBA	2.12	2	1.27	2.23	1.56	1.6	2.7	0.9	1.4	0.73	2.93	2
PUP	G	13. BLANCA	2.6	2.6	1.7	2.9	1.1	1.2	1.23	1.46	1.3	1.16	1.3	1.3
PUP	G	14. TIGRE	2.26	2.26	2.73	2.16	1.93	2.66	1.36	2.03	0.8	1.7	1.2	1.2
PUP	G	15. PIRATA	1.53	1.4	0.66	0.7	1.43	1.13	1.14	1.14	1.14	1.14	1.14	1.14
PUP	S	01. ERIK	3.403	2.102	1.602	1.201	1.301	1.101	1.668	1.668	2.202	2.703	2.903	1.501
PUP	S	02. MARRON	2.402	2.002	2.803	2.002	3.804	1.401	1.802	3.203	15	3.604	2.002	0.801
PUP	S	03. MANCHITA	3.47	3.47	1.068	2.669	2.669	2.936	3.203	1.869	2.669	3.737	2.402	1.602
PUP	S	04. NARANJA	5.606	9.61	1.602	1.869	2.135	15	6.406	2.669	15	15	15	15
PUP	S	05. AMANITA	1.401	1.401	1.802	1.001	1.401	3.003	2.002	1.602	4.605	15	15	15
PUP	S	06. VIOLETA	1.77	1.77	1.77				1.602	1.468	1.735	1.602	2.002	2.269
PUP	S	07. LEX	2.402	1.335	1.869	1.602	1.335	1.335	1.869	1.869	2.135	1.068	1.335	5.339
PUP	S	08. KIRA	15	3.403	8.408	6.807	3.804	2.603	6.206	2.402	2.603	4.605	2.002	15
PUP	S	09. MOROCHO	2.936	9.076	1.602	1.869	5.873	2.402	1.335	2.135	2.669	6.406	2.669	1.602
PUP	S	10. WILLY	1.602	1.602	1.335	1.869	1.869	2.402	2.402	2.135	2.135	4.271	2.936	2.936
PUP	S	11. PUMBA	1.06	1.6	1.86	2.53	2.54	2	1.53	4.55	1.2	2.25	1.35	2.36
PUP	S	12. SIMBA	12.14	7.47	4.2	2.4	2.1	3	2.33	1.9	1.8	2	2.93	2.46
PUP	S	13. BLANCA	1.068	1.26	1.2	2	2.2	2.13	0.66	1.47	2	2.1	2.9	2.1
PUP	S	14. TIGRE	1.5	2.5	1.36	0.95	1.8	1.16	1.36	3.53	1.86	7.34	2.1	7.2
PUP	S	15. PIRATA	1.26	0.93	1.63	2.21	2.52	3.11	1.27	1.27	1.27	1.27	1.27	1.27

## Sheet: Performance
Subject	Group	Correct with G Phase 1	Incorrect with G Phase 1	No choices with G Phase 1	Correct with G Phase 2	Incorrect with G Phase 2	No choices with G Phase 2	Correct with S Phase 1	Incorrect with S Phase 1	No choices with S Phase 1	Correct with S Phase 2	Incorrect with S Phase 2	No choices with S Phase 2
01. FLUTA	FD	3	3	0	4	2	0	5	1	0	4	2	0
02. ROMA	FD	6	0	0	6	0	0	6	0	0	5	1	0
03. VIRUTA	FD	5	1	0	6	0	0	5	1	0	6	0	0
04. TINTA	FD	4	2	0	6	0	0	3	3	0	6	0	0
05. PETUÑA	FD	2	4	0	5	1	0	3	3	0	6	0	0
06. PONGO	FD	6	0	0	4	2	0	5	1	0	5	1	0
07. PERLA	FD	6	0	0	5	1	0	5	1	0	5	1	0
08. HANNA	FD	6	0	0	4	2	0	6	0	0	5	1	0
09. NEGRA	FD	6	0	0	6	0	0	5	0	1	3	2	1
10. CLARITA	FD	4	2	0	6	0	0	6	0	0	6	0	0
11. AMI	FD	6	0	0	5	1	0	5	1	0	5	1	0
12. ROMAN	FD	6	0	0	5	1	0	5	1	0	6	0	0
13.NIGRI	FD	4	0	2	6	0	0	6	0	0	5	0	1
01. ERIK	PUP	5	1	0	6	0	0	5	1	0	6	0	0
02. MARRON	PUP	5	1	0	5	1	0	4	2	0	4	1	1
03. MANCHITA	PUP	3	3	0	5	0	1	4	2	0	5	1	0
04. NARANJA	PUP	5	1	0	4	2	0	3	2	1	1	1	4
05. AMANITA	PUP	4	2	0	0	1	5	5	1	0	2	1	3
06. VIOLETA	PUP	5	1	0	6	0	0	5	0	1	6	0	0
07. LEX	PUP	6	0	0	5	1	0	5	1	0	6	0	0
08. KIRA	PUP	5	0	1	6	0	0	4	1	1	3	2	1
09. MOROCHO	PUP	6	0	0	5	1	0	4	2	0	5	1	0
10. WILLY	PUP	6	0	0	4	2	0	6	0	0	6	0	0
11. PUMBA	PUP	4	2	0	5	1	0	4	2	0	3	3	0
12. SIMBA	PUP	6	0	0	6	0	0	6	0	0	6	0	0
13. BLANCA	PUP	6	0	0	6	0	0	6	0	0	5	1	0
14. TIGRE	PUP	3	3	0	5	1	0	5	1	0	6	0	0
15. PIRATA	PUP	6	0	0	6	0	0	6	0	0	6	0	0
01. ALMENDRA	shd	6	0	0	6	0	0	6	0	0	3	1	2
02. ALVINA	shd	6	0	0	6	0	0	4	1	1	6	0	0
03. ANIK	shd	5	1	0	6	0	0	3	0	3	6	0	0
04. ARIEL	shd	6	0	0	5	1	0	3	0	3	3	2	1
05. BRIXA	shd	4	0	2	6	0	0	5	0	1	3	1	2
06. CARPINCHO	shd	6	0	0	6	0	0	5	0	1	2	0	4
07. CIEL	shd	4	2	0	4	2	0	6	0	0	6	0	0
08. HUESO	shd	6	0	0	6	0	0	4	2	0	4	1	1
09. JANIS	shd	6	0	0	5	1	0	5	1	0	5	0	1
10. KING	shd	2	4	0	4	2	0	4	2	0	4	2	0
11. OSO	shd	6	0	0	6	0	0	4	1	1	5	0	1
12. RAFAELA	shd	5	1	0	6	0	0	4	1	1	6	0	0
13. APOLO	shd	4	1	1	3	3	0	2	2	2	2	1	3
14. NEGRO	shd	6	0	0	5	1	0	6	0	0	4	2	0
15. MARCELA	shd	4	2	0	4	2	0	3	3	0	4	2	0
16. MAFALDA	shd	5	1	0	4	2	0	5	1	0	6	0	0
17. KALENA	shd	4	2	0	5	1	0	4	1	1	5	1	0
18. LINDA	shd	5	1	0	5	1	0	6	0	0	3	2	1
19. MARRON	shd	5	1	0	3	3	0	5	1	0	4	2	0

## Sheet: First Choice
Subject	Group	Fist Choice	Chocie Test	Sex	Size	Beginning	G's Gender
01. ERIK	PUP	G	1	Male		G	Male
02. MARRON	PUP	S	1	Male		G	Male
03. MANCHITA	PUP	S	1	Female		G	Male
04. NARANJA	PUP	S	1	Male		G	Female
05. AMANITA	PUP	G	1	Female		M	Female
06. VIOLETA	PUP	G	1	Female		M	Male
07. LEX	PUP	G	1	Male		M	Male
08. KIRA	PUP	S	1	Female		M	Female
09. MOROCHO	PUP	S	1	Male		M	Male
10. WILLY	PUP	G	1	Male		M	Female
11. PUMBA	PUP	S	1	Male		M	Female
12. SIMBA	PUP	G	1	Male		G	Male
13. BLANCA	PUP	G	1	Female		M	Female
14. TIGRE	PUP	S	1	Male		G	Female
15. PIRATA	PUP	G	1	Male		G	Male
01. ALMENDRA	SHD	No chocie	1	Female	Medium	G	Female
02. ALVINA	SHD	No chocie	1	Female	Medium	G	Female
03. ANIK	SHD	No chocie	1	Female	Big	M	Female
04. ARIEL	SHD	G	1	Male	Medium	M	Male
05. BRIXA	SHD	No chocie	1	Male	Medium	G	Female
06. CARPINCHO	SHD	G	1	Male	Big	M	Female
07. CIEL	SHD	G	1	Female	Medium	G	Male
08. HUESO	SHD	G	1	Male	Big	M	Male
09. JANIS	SHD	G	1	Female	Medium	M	Female
10. KING	SHD	G	1	Male	Big	M	Male
11. OSO	SHD	G	1	Male	Big	G	Male
12. RAFAELA	SHD	G	1	Female	Medium	G	Male
13. APOLO	SHD	No chocie	1	Male	Big	G	Female
14. NEGRO	SHD	S	1	Male	Big	M	Female
15. MARCELA	SHD	G	1	Female	Big	G	Male
16. MAFALDA	SHD	S	1	Female	Big	M	Male
17. KALENA	SHD	S	1	Female	Big	G	Female
18. LINDA	SHD	G	1	Female	Medium	M	Female
19. MARRON	SHD	G	1	Male	Medium	G	Male
01. FLUTA	FD	G	1	Female	Medium	M	Female
02. ROMA	FD	G	1	Female	Big	M	Female
03. VIRUTA	FD	G	1	Female	Medium	G	Male
04. TINTA	FD	G	1	Female	Medium	G	Male
05. PETUÑA	FD	G	1	Female	Medium	M	Female
06. PONGO	FD	S	1	Male	Big	M	Male
07. PERLA	FD	G	1	Female	Big	M	Female
08. HANNA	FD	G	1	Female	Big	G	Male
09. NEGRA	FD	G	1	Female	Big	G	Female
10. CLARITA	FD	S	1	Female	Big	G	Male
11. AMI	FD	S	1	Female	Big	M	Male
12. ROMAN	FD	G	1	Male	Medium	G	Male
13.NIGRI	FD	G	1	Female	Medium	G	Female
01. ERIK	PUP	G	2	Male		G	Male
02. MARRON	PUP	No chocie	2	Male		G	Male
03. MANCHITA	PUP	No chocie	2	Female		G	Male
04. NARANJA	PUP	No chocie	2	Male		G	Female
05. AMANITA	PUP	G	2	Female		M	Female
06. VIOLETA	PUP	G	2	Female		M	Male
07. LEX	PUP	G	2	Male		M	Male
08. KIRA	PUP	G	2	Female		M	Female
09. MOROCHO	PUP	S	2	Male		M	Male
10. WILLY	PUP	G	2	Male		M	Female
11. PUMBA	PUP	G	2	Male		M	Female
12. SIMBA	PUP	No chocie	2	Male		G	Male
13. BLANCA	PUP	S	2	Female		M	Female
14. TIGRE	PUP	No chocie	2	Male		G	Female
15. PIRATA	PUP	S	2	Male		G	Male
01. ALMENDRA	SHD	G	2	Female	Medium	G	Female
02. ALVINA	SHD	G	2	Female	Medium	G	Female
03. ANIK	SHD	G	2	Female	Big	M	Female
04. ARIEL	SHD	No chocie	2	Male	Medium	M	Male
05. BRIXA	SHD	S	2	Male	Medium	G	Female
06. CARPINCHO	SHD	G	2	Male	Big	M	Female
07. CIEL	SHD	G	2	Female	Medium	G	Male
08. HUESO	SHD	S	2	Male	Big	M	Male
09. JANIS	SHD	S	2	Female	Medium	M	Female
10. KING	SHD	No chocie	2	Male	Big	M	Male
11. OSO	SHD	S	2	Male	Big	G	Male
12. RAFAELA	SHD	G	2	Female	Medium	G	Male
13. APOLO	SHD	G	2	Male	Big	G	Female
14. NEGRO	SHD	S	2	Male	Big	M	Female
15. MARCELA	SHD	G	2	Female	Big	G	Male
16. MAFALDA	SHD	S	2	Female	Big	M	Male
17. KALENA	SHD	G	2	Female	Big	G	Female
18. LINDA	SHD	G	2	Female	Medium	M	Female
19. MARRON	SHD	S	2	Male	Medium	G	Male
01. FLUTA	FD	G	2	Female	Medium	M	Female
02. ROMA	FD	G	2	Female	Big	M	Female
03. VIRUTA	FD	G	2	Female	Medium	G	Male
04. TINTA	FD	G	2	Female	Medium	G	Male
05. PETUÑA	FD	S	2	Female	Medium	M	Female
06. PONGO	FD	G	2	Male	Big	M	Male
07. PERLA	FD	G	2	Female	Big	M	Female
08. HANNA	FD	S	2	Female	Big	G	Male
09. NEGRA	FD	S	2	Female	Big	G	Female
10. CLARITA	FD	S	2	Female	Big	G	Male
11. AMI	FD	S	2	Female	Big	M	Male
12. ROMAN	FD	G	2	Male	Medium	G	Male
13.NIGRI	FD	G	2	Female	Medium	G	Female

## Sheet: Gaze and Proximity
		Time spent in proximity Choice Test 1		Time Gazing Choice Test 1		Time spent in proximity Choice Test 2		Time Gazing Choice Test 2
Subject	Group	G	S	G	S	G	S	G	S
01. FLAUTA	FD	15.67	0	13	1.67	4	11	1.33	7
02. ROMA	FD	15.67	0	15.33	1.33	14.33	0	9.33	7.33
03. VIRUTA	FD	5.33	9.33	2	5.33	7.33	4	6	3.33
04. TINTA	FD	12.33	0	9.67	1.67	4.67	11	1.33	8.67
05. PETUÑA	FD	7	6.67	6.67	3	6.67	6.67	6	6.33
06. PONGO	FD	3	12.33	3.67	10.33	13.33	1.67	14	2.33
07. PERLA	FD	3.33	13	3.67	13.33	10.67	2	4.67	6.67
08. HANNA	FD	16	0	3.67	3.67	13	2	4	1.67
09. NEGRA	FD	8.33	3.33	5.33	2.67	0	3.67	4.67	7.67
10. CLARITA	FD	9.67	2	9	1.67	6	8.67	1.33	2
11. AMI	FD	0	14.67	1.33	6	0	15	1.67	6.67
12. ROMAN	FD	3.33	8	6	4	4.67	5	3	3.67
13.NIGRI	FD	9.67	0	10.67	2.67	3	1.33	1	1
01. ERIK	PUP	10	0	1.67	0	7.67	2.33	0	0
02. MARRON	PUP	3	7.67	1.67	1.33	0	0	0	0
03. MANCHITA	PUP	0	10.33	0	4	10	0	0	0
04. NARANJA	PUP	0	14.33	0	0.33	0	0	0	0
05. AMANITA	PUP	14.33	0	6.33	0	7.67	5.33	2.67	0
06. VIOLETA	PUP	Missing video	Missing video	Missing video	Missing video	11.22	7.59	0	0
07. LEX	PUP	0	0	0	0	11.33	0	7.67	0
08. KIRA	PUP	9	0	0.67	0	4.33	8	1.67	5.67
09. MOROCHO	PUP	0	20.33	0	9.33	13	1.33	4.67	1.33
10. WILLY	PUP	8	6	3	4	8	6.67	2.67	3.33
11. PUMBA	PUP	10.33	3.33	8	3	5.67	8.67	1.67	2.33
12. SIMBA	PUP	5.67	1.67	0.67	1.33	2.33	7.67	2.33	1
13. BLANCA	PUP	4.67	3.67	3	3	4.33	4.33	1.67	0
14. TIGRE	PUP	10.67	7.33	2	1.67	9.67	5	6.67	3.33
15. PIRATA	PUP	12.67	2	9.67	1.33	0	0	0	0
01. ALMENDRA	SHD	0	0	0.33	8.67	3.67	10.67	3.67	2
02. ALVINA	SHD	1.67	0	0.33	1.33	1	3.67	1.33	1
03. ANIK	SHD	0	0	4	12.67	12.67	0	10	0.67
04. ARIEL	SHD	0	1.67	0.67	2	0	1.33	1	0
05. BRIXA	SHD	0	0	9	5.33	0	7	1.33	4
06. CARPINCHO	SHD	14.33	0	11	5.33	11	0	5.33	2.67
07. CIEL	SHD	8.67	2.33	7	4	10.33	0	8	1.33
08. HUESO	SHD	12.67	0	9.33	2	10.67	3.67	4	4.67
09. JANIS	SHD	10.67	3	2	0	11	2	9.67	2.33
10. KING	SHD	14.33	0	3	1.33	0	0	1	1
11. OSO	SHD	1.33	0	4	0	0	7.67	1	3.33
12. RAFAELA	SHD	11.33	0	4	1.67	10	0	1.67	1
13. APOLO	SHD	0	1.33	0.33	2.33	11	0	2.67	2
14. NEGRO	SHD	7.67	5	6.33	5.67	1.33	10	1.33	4.67
15. MARCELA	SHD	11.33	0	1.67	0	11.67	0	14	0.67
16. MAFALDA	SHD	1.67	9.67	3	8.33	1	4	6	6.67
17. KALENA	SHD	11.33	0	10.33	3	15.33	0	9.33	3.67
18, LINDA	SHD	8	2	2.33	1.33	2.33	1	8.67	1.67
19. MARRON	SHD	4.33	3.33	3	3.67	6	6.33	0	2
